# Supplementary material
Source: PubMed Central journal article supplement (PMC10201404)
Supplement: jama-e232065-s001.pdf [file jama-e232065-s001.pdf]

## Supplemental Online Content

Diaz AA, Orejas JL, Grumley S, et al. Airway-occluding mucus plugs and mortality in patients with chronic obstructive pulmonary disease. *JAMA*.  
doi:10.1001/jama.2023.2065

### **eMethods**

**eFigure 1.** Computed Tomography Sections Showing Airways Completely Occluded With Mucus Plugs

**eFigure 2.** Illustration of the Mucus Plug Score

**eFigure 3.** Distribution of Mucus Plug Scores in 4363 Participants With Chronic Obstructive Pulmonary Disease

### **eReferences**

**eAppendix.** Funding and Acknowledgments

This supplemental material has been provided by the authors to give readers additional information about their work.

## eMethods

### ASSESSING MUCUS PLUGS ON CT

The computed tomography (CT) mucus plug assessment was conducted between September 2018 and April 2022, following a method described in the main text. The readers who scored mucus plugs comprised thoracic radiologists, physicians, and a pulmonologist, and they entered their scores into a centralized collection form on the Redcap platform. Before scoring study participants' CT scans, the readers underwent training, which consisted of identifying a variety of mucus plugs on a set of typical CT images, scoring a training set of CT scans to learn the scoring system, and scoring a sample set of 20 CT scans to verify the inter-reader agreement.

### MEASURING AIRWAY LUMEN SIZE ON CT

We used CT data from 39 participants to measure the airway luminal sizes. The measurements were taken with in-house open source software Slicer ([www.Slicer.org](http://www.Slicer.org)) by an analyst with experience in lung imaging, using a method previously described.<sup>1</sup> The right upper lobe segment was selected (see eFigure 2 below), and measurements were taken from the segmental bronchus (designated as 3<sup>rd</sup> generation) to the 6<sup>th</sup> or 7<sup>th</sup> generation bronchus. Sixth and 7<sup>th</sup> airway generations are typically at approximately a distance of 2 cm out of the pleura (note that the distance from the last airway generation deemed for mucus plugging assessment and the costal and diaphragmatic edges of the lung was judged by eye, and not objectively measured). One to two airway measurements were taken in each generation. After placing a point in the center of the lumen, the software provided the airway measurements, including airway lumen radii. The measurements of airway lumen radii were averaged per generation, providing measurements for the approximate range of airway sizes surveyed for mucus plugging. The approximate airway lumen diameter range was from ~2 mm (7<sup>th</sup> airway generation) to 10 mm (3<sup>rd</sup> airway generation).

### CLINICAL ASSESSMENT

The Body mass index, Obstruction, Dyspnea, and Exercise (BODE) mortality risk score for each participant was calculated.<sup>2</sup> BODE is comprised of four factors, body mass index, forced expiratory volume in one second (FEV<sub>1</sub>), dyspnea, and six-minute walk distance. Dyspnea was rated with the modified Medical Research Council (mMRC) Scale (range, 0-4). Six-minute walk distance was measured using a standard protocol.<sup>3</sup> The participants were asked about a history of asthma with the questions, “Have you had asthma?” and “Do you still have it?” If the participant responded yes to both questions, then we considered the participant had a history of current asthma. Exacerbations after enrollment were ascertained with the Longitudinal Follow-up program of COPDGene.<sup>4</sup> In this program, the participants were asked to report their exacerbations every 6 months by telephone contact and web-based surveys. An exacerbation was defined as an increase or new onset of respiratory symptoms (cough, phlegm, dyspnea) treated with antibiotics and/or systemic corticosteroids.<sup>5</sup> Symptoms were quantified by answers to questions in a respiratory questionnaire modified from the Epidemiology Standardization Project questionnaire (American Thoracic Society–Division of Lung Diseases [ATS-DLD]-78).<sup>6</sup>

### STATISTICAL ANALYSIS

The inter-reader agreement for mucus plug score was evaluated with intra-class correlation coefficients using the mean scores of participating readers. We used two-way mixed effect models to compute intra-class correlation coefficients.<sup>7</sup> The association between mucus plugs and all-cause mortality was assessed with Cox proportional hazard regression analysis. The *a priori* multivariable model included age, sex, race, BMI, pack-years, smoking status (current vs. former), postbronchodilator FEV<sub>1</sub>, and CT measures of airway wall thickness and emphysema as potential confounders. Additionally, the adjusted model described above included subsequent adjustment as follows:

-Adjusted model plus coronary artery disease

-Adjusted model plus coronary artery disease plus chronic bronchitis

-Adjusted model plus coronary artery disease plus chronic bronchitis plus history of current asthma

-Adjusted model plus coronary artery disease plus chronic bronchitis plus history of current asthma plus the number of exacerbations/year.

Finally, we included the BODE index to the adjusted model described above except FEV<sub>1</sub> and BMI. The FEV<sub>1</sub> and BMI were excluded because those variables are part of the BODE index. The model with BODE index did not include coronary artery disease, chronic bronchitis, history of current asthma, and the number of exacerbations/year. The probabilities of death used to perform the right panel plot of Figure 2 of the main text are computed by averaging the estimated survival curves for the observations within each mucus plug score category, using the covariates of the adjusted model described above with the direct adjusted survival feature of SAS.<sup>8</sup> A statistician (WW) conducted the analyses using the SAS 9.4 (SAS Institute, Cary, NC) software.

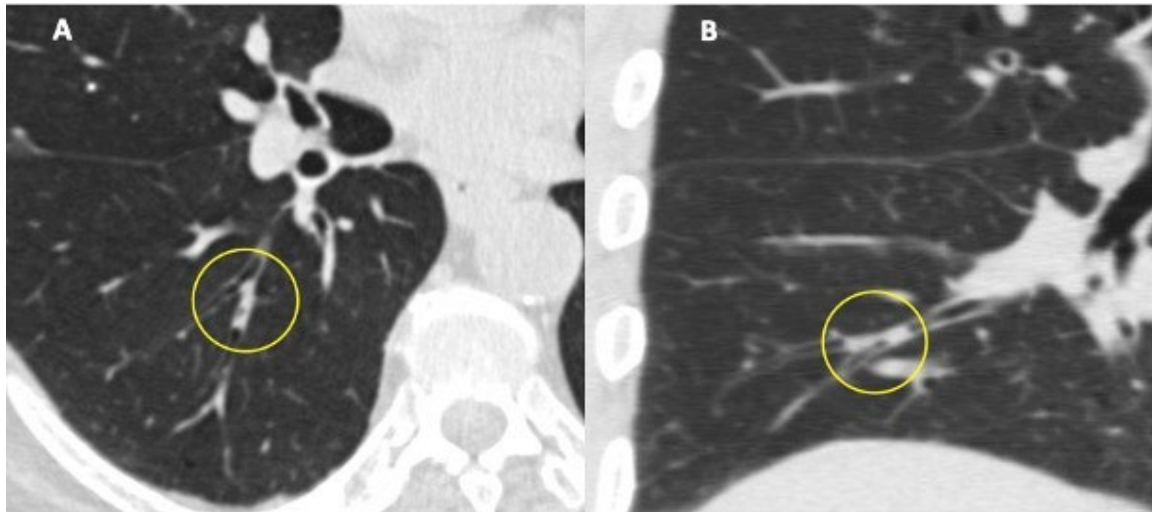

**eFigure 1** Computed Tomography (CT) Sections Showing Airways Completely Occluded with Mucus Plugs (Yellow Circles).

CT axial (A) and coronal (B) sections of the right lower lobe are from two participants with Chronic Obstructive Pulmonary Disease.

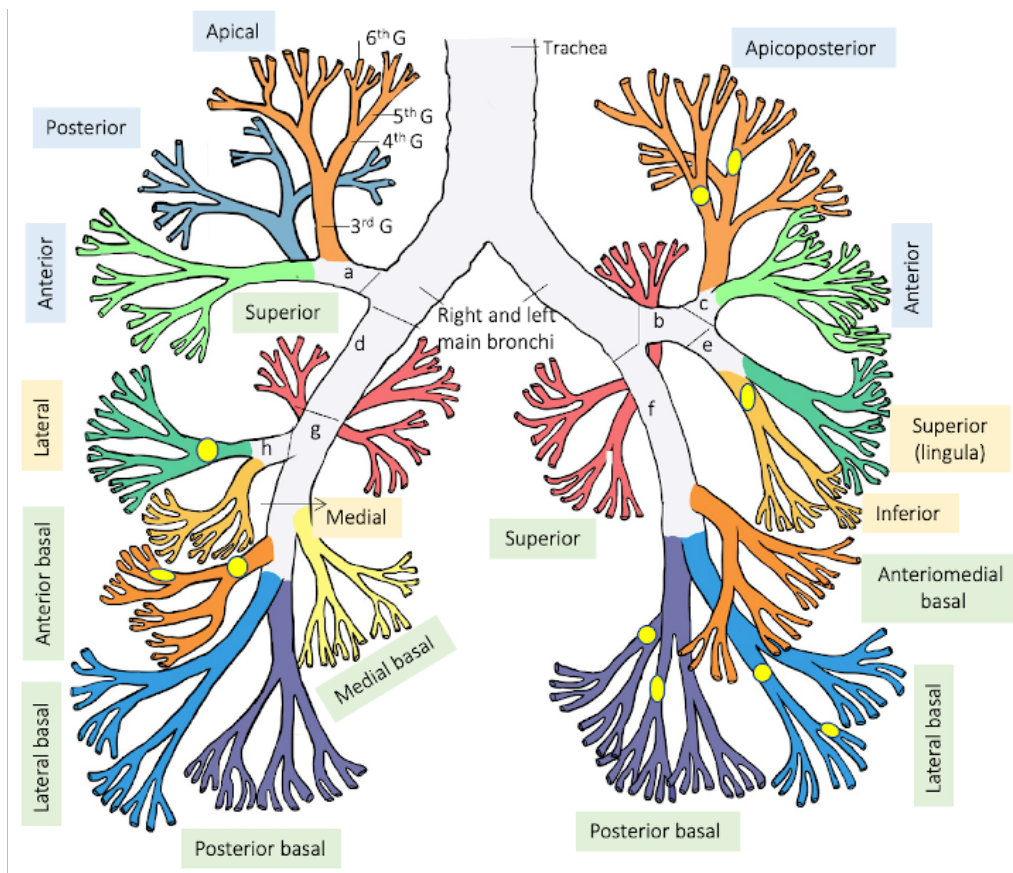

**eFigure 2** Illustration of the Mucus Plug Score. The score is based on counting the number of lung segments with mucus plugs completely blocking middle-to-large-sized airways (i.e., ~2-10 mm-lumen diameter) on computed tomography scans. Readers recorded the number of lung segments with mucus plugs in each lobe, with the lingula as a separate lobe. The score ranges from 0 (no mucus plugs seen in any lung segments) to 18 (all lung segments with mucus plugs). The employed bronchial nomenclature consists of 18 lung segments (right lung: 3, 2, and 5 lung segments in the upper, middle, and lower lobes, respectively; left lung: 2, 2, and 4 lung segments in the upper lobe, lingula, and lower lobe, respectively). Mucus plugs (yellow dots) are present in different airway generations of several lung segments, yielding a score of 6 (i.e., one lung segment with plugs in each of the following: right middle lobe, right lower lobe, left upper lobe, and lingula, and two lung segments with mucus plugs in the left lower lobe).

Designations: right upper lobe lung segments: apical, posterior, and anterior (labels with light blue background); right middle lobe lung segments: lateral, medial (labels with yellow background); right lower lobe lung segments: superior, medial basal, anterior basal, lateral basal, and posterior basal (labels with light green background); left upper lobe lung segments: apicoposterior, anterior (labels with light blue background); lingula lung segments: superior, inferior (labels with yellow background); left lower lobe lung segments: superior, anteromedial basal, lateral basal, and posterior basal (labels with light green background). Airway generations (G) are depicted in the right apical lung segment: 3<sup>rd</sup> G, (also termed segmental), 4<sup>th</sup> G (also termed sub-segmental), 5<sup>th</sup> G (also termed sub-sub-segmental), and 6<sup>th</sup> G. a = right upper lobe bronchus; b = left upper lobe bronchus; c = superior division bronchus of the left upper lobe; d = intermediate bronchus; e = lingular bronchus; f = left lower lobe bronchus; g = right lower lobe bronchus; h = right middle lobe bronchus. Bronchial nomenclature based on Netter's Atlas of Human Anatomy.<sup>9</sup> Designations of airway generations have been previously reported.<sup>10</sup> Bronchial tree scheme by Anastasia Payá-Mora adapted from Netter's Atlas of Human Anatomy.<sup>9</sup>

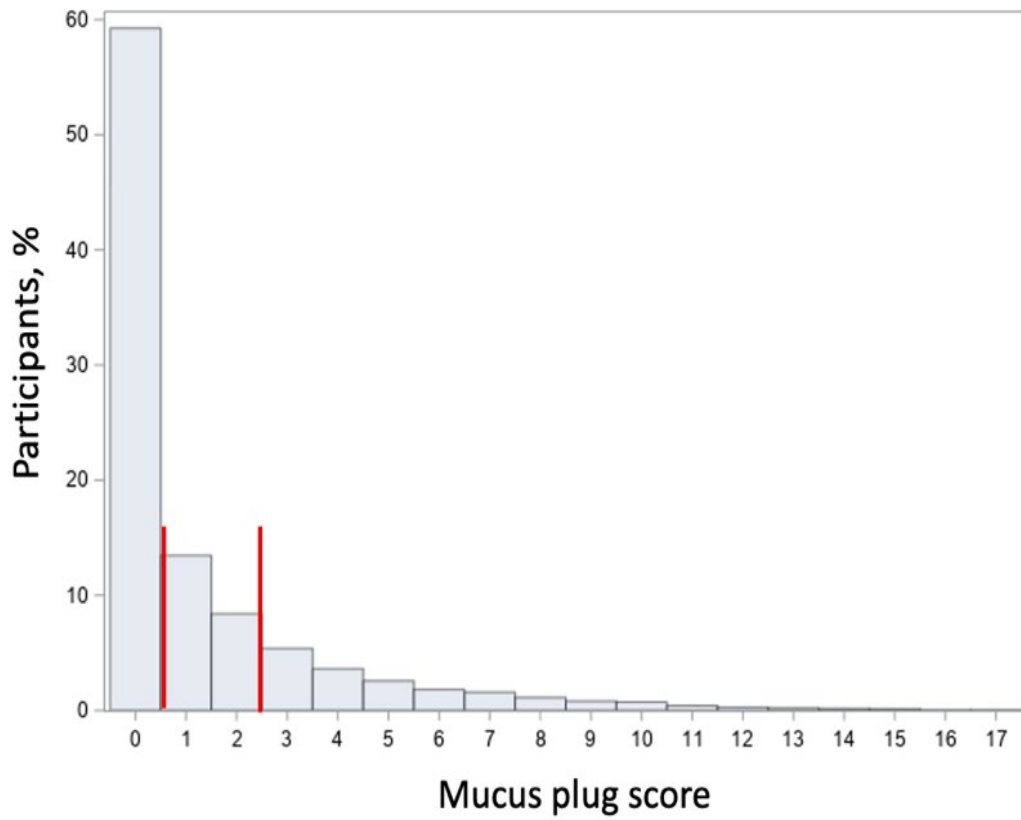

**eFigure 3** Distribution of Mucus Plug Scores in 4,363 Participants with Chronic Obstructive Pulmonary Disease.

Red lines indicate cut off points used to categorize the mucus plugs scores: 0, 1-2, and  $\geq 3$  lung segments with mucus plugs.

## eReferences

1. Yamashiro T, Matsuoka S, Estepar RS, et al. Quantitative assessment of bronchial wall attenuation with thin-section CT: An indicator of airflow limitation in chronic obstructive pulmonary disease. *AJR American journal of roentgenology*. 2010;195(2):363-369.
2. Celli BR, Cote CG, Marin JM, et al. The body-mass index, airflow obstruction, dyspnea, and exercise capacity index in chronic obstructive pulmonary disease. *N Engl J Med*. 2004;350(10):1005-1012.
3. ATS statement: guidelines for the six-minute walk test. *Am J Respir Crit Care Med*. 2002;166(1):111-117.
4. Stewart JI, Moyle S, Criner GJ, et al. Automated telecommunication to obtain longitudinal follow-up in a multicenter cross-sectional COPD study. *COPD*. 2012;9(5):466-472.
5. Bowler RP, Kim V, Regan E, et al. Prediction of acute respiratory disease in current and former smokers with and without COPD. *Chest*. 2014;146(4):941-950.
6. Ferris BG. Epidemiology Standardization Project (American Thoracic Society). *Am Rev Respir Dis*. 1978;118(6 Pt 2):1-120.
7. Koo TK, Li MY. A Guideline of Selecting and Reporting Intraclass Correlation Coefficients for Reliability Research. *J Chiropr Med*. 2016;15(2):155-163.
8. Makuch RW. Adjusted survival curve estimation using covariates. *J Chronic Dis*. 1982;35(6):437-443.
9. Netter F. *Atlas of Human Anatomy*. Summit, NJ: Medical Education and Publishing , Ciba-Geigy Corporation; 1989.
10. Diaz AA, Valim C, Yamashiro T, et al. Airway count and emphysema assessed by chest CT imaging predicts clinical outcome in smokers. *Chest*. 2010;138(4):880-887.

## eAppendix

### FUNDING AND ACKNOWLEDGEMENTS

#### COPDGene Phase 3

##### Grant Support and Disclaimer

The project described was supported by Award Number U01 HL089897 and Award Number U01 HL089856 from the National Heart, Lung, and Blood Institute. The content is solely the responsibility of the authors and does not necessarily represent the official views of the National Heart, Lung, and Blood Institute or the National Institutes of Health.

##### COPD Foundation Funding

COPDGene is also supported by the COPD Foundation through contributions made to an Industry Advisory Board comprised of AstraZeneca, Boehringer-Ingelheim, Genentech, GlaxoSmithKline, Novartis, Pfizer, Siemens, and Sunovion.

##### COPDGene® Investigators – Core Units

*Administrative Center:* James D. Crapo, MD (PI); Edwin K. Silverman, MD, PhD (PI); Barry J. Make, MD; Elizabeth A. Regan, MD, PhD

*Genetic Analysis Center:* Terri Beaty, PhD; Ferdouse Begum, PhD; Peter J. Castaldi, MD, MSc; Michael Cho, MD; Dawn L. DeMeo, MD, MPH; Adel R. Boueiz, MD; Marilyn G. Foreman, MD, MS; Eitan Halper-Stromberg; Lystra P. Hayden, MD, MMSc; Craig P. Hersh, MD, MPH; Jacqueline Hetmanski, MS, MPH; Brian D. Hobbs, MD; John E. Hokanson, MPH, PhD; Nan Laird, PhD; Christoph Lange, PhD; Sharon M. Lutz, PhD; Merry-Lynn McDonald, PhD; Margaret M. Parker, PhD; Dmitry Prokopenko, PhD; Dandi Qiao, PhD; Elizabeth A. Regan, MD, PhD; Phuwanat Sakornsakolpat, MD; Edwin K. Silverman, MD, PhD; Emily S. Wan, MD; Sungho Won, PhD

*Imaging Center:* Juan Pablo Centeno; Jean-Paul Charbonnier, PhD; Harvey O. Coxson, PhD; Craig J. Galban, PhD; MeiLan K. Han, MD, MS; Eric A. Hoffman, Stephen Humphries, PhD; Francine L. Jacobson, MD, MPH; Philip F. Judy, PhD; Ella A. Kazerooni, MD; Alex Kluiber; David A. Lynch, MB; Pietro Nardelli, PhD; John D. Newell, Jr., MD; Aleena Notary; Andrea Oh, MD; Elizabeth A. Regan, MD, PhD; James C. Ross, PhD; Raul San Jose Estepar, PhD; Joyce Schroeder, MD; Jered Sieren; Berend C. Stoel, PhD; Juerg Tschirren, PhD; Edwin Van Beek, MD, PhD; Bram van Ginneken, PhD; Eva van Rikxoort, PhD; Gonzalo Vegas Sanchez-Ferrero, PhD; Lucas Veitel; George R. Washko, MD; Carla G. Wilson, MS;

*PFT QA Center, Salt Lake City, UT:* Robert Jensen, PhD

*Data Coordinating Center and Biostatistics, National Jewish Health, Denver, CO:* Douglas Everett, PhD; Jim Crooks, PhD; Katherine Pratte, PhD; Matt Strand, PhD; Carla G. Wilson, MS

*Epidemiology Core, University of Colorado Anschutz Medical Campus, Aurora, CO:* John E. Hokanson, MPH, PhD; Gregory Kinney, MPH, PhD; Sharon M. Lutz, PhD; Kendra A. Young, PhD

*Mortality Adjudication Core:* Surya P. Bhatt, MD; Jessica Bon, MD; Alejandro A. Diaz, MD, MPH; MeiLan K. Han, MD, MS; Barry Make, MD; Susan Murray, ScD; Elizabeth Regan, MD; Xavier Soler, MD; Carla G. Wilson, MS

*Biomarker Core:* Russell P. Bowler, MD, PhD; Katerina Kechris, PhD; Farnoush Banaei-Kashani, PhD

##### COPDGene® Investigators – Clinical Centers

*Ann Arbor VA:* Jeffrey L. Curtis, MD; Perry G. Pernicano, MD

*Baylor College of Medicine, Houston, TX:* Nicola Hanania, MD, MS; Mustafa Atik, MD; Aladin Boriek, PhD; Kalpatha Guntupalli, MD; Elizabeth Guy, MD; Amit Parulekar, MD;

*Brigham and Women's Hospital, Boston, MA:* Dawn L. DeMeo, MD, MPH; Alejandro A. Diaz, MD, MPH; Lystra P. Hayden, MD; Brian D. Hobbs, MD; Craig Hersh, MD, MPH; Francine L. Jacobson, MD, MPH; George Washko, MD

*Columbia University, New York, NY:* R. Graham Barr, MD, DrPH; John Austin, MD; Belinda D'Souza, MD; Byron Thomashow, MD

*Duke University Medical Center, Durham, NC:* Neil MacIntyre, Jr., MD; H. Page McAdams, MD; Lacey Washington, MD

*Grady Memorial Hospital, Atlanta, GA:* Eric Flenaugh, MD; Silanth Terpenning, MD

*HealthPartners Research Institute, Minneapolis, MN:* Charlene McEvoy, MD, MPH; Joseph Tashjian, MD

*Johns Hopkins University, Baltimore, MD:* Robert Wise, MD; Robert Brown, MD; Nadia N. Hansel, MD, MPH; Karen Horton, MD; Allison Lambert, MD, MHS; Nirupama Putcha, MD, MHS

*Lundquist Institute for Biomedical Innovation at Harbor UCLA Medical Center, Torrance, CA:* Richard Casaburi, PhD, MD; Alessandra Adami, PhD; Matthew Budoff, MD; Hans Fischer, MD; Janos Porszasz, MD, PhD; Harry Rossiter, PhD; William Stringer, MD

*Michael E. DeBakey VAMC, Houston, TX:* Amir Sharafkhaneh, MD, PhD; Charlie Lan, DO

*Minneapolis VA:* Christine Wendt, MD; Brian Bell, MD; Ken M. Kunisaki, MD, MS

*National Jewish Health, Denver, CO:* Russell Bowler, MD, PhD; David A. Lynch, MB

*Reliant Medical Group, Worcester, MA:* Richard Rosiello, MD; David Pace, MD

*Temple University, Philadelphia, PA:* Gerard Criner, MD; David Ciccolella, MD; Francis Cordova, MD; Chandra Dass, MD; Gilbert D'Alonzo, DO; Parag Desai, MD; Michael Jacobs, PharmD; Steven Kelsen, MD, PhD; Victor Kim, MD; A. James Mamary, MD; Nathaniel Marchetti, DO; Aditi Satti, MD; Kartik Shenoy, MD; Robert M. Steiner, MD; Alex Swift, MD; Irene Swift, MD; Maria Elena Vega-Sanchez, MD

*University of Alabama, Birmingham, AL:* Mark Dransfield, MD; William Bailey, MD; Surya P. Bhatt, MD; Anand Iyer, MD; Hrudaya Nath, MD; J. Michael Wells, MD

*University of California, San Diego, CA:* Douglas Conrad, MD; Xavier Soler, MD, PhD; Andrew Yen, MD

*University of Iowa, Iowa City, IA:* Alejandro P. Comellas, MD; Karin F. Hoth, PhD; John Newell, Jr., MD; Brad Thompson, MD

*University of Michigan, Ann Arbor, MI:* MeiLan K. Han, MD MS; Ella Kazerooni, MD MS; Wassim Labaki, MD MS; Craig Galban, PhD; Dharshan Vummidi, MD

*University of Minnesota, Minneapolis, MN:* Joanne Billings, MD; Abbie Begnaud, MD; Tadashi Allen, MD

*University of Pittsburgh, Pittsburgh, PA:* Frank Sciorba, MD; Jessica Bon, MD; Divay Chandra, MD, MSc; Joel Weissfeld, MD, MPH



*University of Texas Health, San Antonio, San Antonio, TX: Antonio Anzueto, MD; Sandra Adams, MD; Diego Maselli-Caceres, MD; Mario E. Ruiz, MD; Harjinder Singh.*
