# Supplementary material
Source: PubMed Central journal article supplement (PMC10201404)
Supplement: jama-e232065-s002.pdf [file jama-e232065-s002.pdf]

## Data Sharing Statement

Diaz. Airway-Occluding Mucus Plugs and Mortality in Patients With Chronic Obstructive Pulmonary Disease. *JAMA*. Published May 21, 2023. doi:10.1001/jama.2023.2065

### Data

**Data available:** Yes

**Data types:** Deidentified participant data

**How to access data:** [www.copdgene.org](http://www.copdgene.org)

**When available:** beginning date: 02-28-2024

### Supporting Documents

**Document types:** None

### Additional Information

**Who can access the data:** Data are available for investigators that present a reasonable request, following the procedures of the COPDGene Study.

**Types of analyses:** Data are available for scientific purposes.

**Mechanisms of data availability:** Data are shared based on the approval of a proposal.
